# Supplementary material for: Maternal stevioside supplementation ameliorates intestinal mucosal damage and modulates gut microbiota in chicken offspring challenged with lipopolysaccharide
Source: Royal Society of Chemistry journal article supplement (doi:10.1039/d0fo02871a), 2021-01-01
Supplement: d0fo02871a2.pdf [file d0fo02871a2.pdf]

Supplementary Figure S1. The significantly enriched predicted differential KEGG pathways (KEGG level 3). The Tax4Fun functional prediction was compared between the LPS and LSTE groups.
