# Supplementary material for: Maternal stevioside supplementation ameliorates intestinal mucosal damage and modulates gut microbiota in chicken offspring challenged with lipopolysaccharide
Source: Royal Society of Chemistry journal article supplement (doi:10.1039/d0fo02871a), 2021-01-01
Supplement: d0fo02871a3.pdf [file d0fo02871a3.pdf]

Table S1. Primer sequences used in this study

| Gene                            | primer sequence (5' → 3')         | amplicon size (bp) | GeneBank accession number |
|---------------------------------|-----------------------------------|--------------------|---------------------------|
| <i>TLR4</i>                     | Forward: AGGCACCTGAGCTTTTCCTC     | 96                 | NM_001030693.1            |
|                                 | Reverse: TACCAACGTGAGGTTGAGCC     |                    |                           |
| <i>IL-6</i>                     | Forward: TTTATGGAGAAGACCGTGAG     | 105                | NM_204628.1               |
|                                 | Reverse: GTGGCAGATTGGTAACAGAG     |                    |                           |
| <i>IL-1<math>\beta</math></i>   | Forward: CCGAGGAGCAGGGACTTT       | 132                | NM_204524.1               |
|                                 | Reverse: GGACTGTGAGCGGGTGTAG      |                    |                           |
| <i>IFN-<math>\gamma</math></i>  | Forward: AACAACTTCCTGATGGCGT      | 106                | NM_205149.1               |
|                                 | Reverse: TGAAGAGTTCATTCGCGGCT     |                    |                           |
| <i>CLDN1</i>                    | Forward: CATACTCCTGGGTCTGGTTGGT   | 100                | NM_001013611.2            |
|                                 | Reverse: GACAGCCATCCGCATCTTCT     |                    |                           |
| <i>CLDN2</i>                    | Forward: CTGCTCACCTCATTGGA        | 140                | NM_001277622.1            |
|                                 | Reverse: AACTCACTCTTGGGCTTCTG     |                    |                           |
| <i>ZO-1</i>                     | Forward: CTTCAGGTGTTTCTCTTCCTCCTC | 131                | XM_015278975.2            |
|                                 | Reverse: CTGTGGTTTCATGGCTGGATC    |                    |                           |
| <i>OCN</i>                      | Forward: ACGGCAGCACCTACCTCAA      | 123                | NM_205128.1               |
|                                 | Reverse: GGGCGAAGAAGCAGATGAG      |                    |                           |
| <i>MUC2</i>                     | Forward: GTGTGCCCTGATGTCACAGA     | 246                | NM_001318434.1            |
|                                 | Reverse: GGCCTGAGCCTTGGTACATT     |                    |                           |
| <i><math>\beta</math>-actin</i> | Forward: TGTTACCAACACCCACACCC     | 110                | NM_205518.1               |
|                                 | Reverse: TCCTGAGTCAAGCGCCAAAA     |                    |                           |

*TLR4*, toll like receptor 4; *IL-6*, interleukin 6; *IL-1 $\beta$* , interleukin 1 beta; *IFN- $\gamma$* , interferon- $\gamma$ ; *CLDN1*, claudin 1; *CLDN2*, claudin 2; *ZO-1*, zonula occludens-1; *OCN*, occludin; *MUC2*, mucin 2.
