# Supplementary figures and images for: Maternal stevioside supplementation ameliorates intestinal mucosal damage and modulates gut microbiota in chicken offspring challenged with lipopolysaccharide
Source: Royal Society of Chemistry journal article supplement (doi:10.1039/d0fo02871a), 2021-01-01

LPS LPS.STE

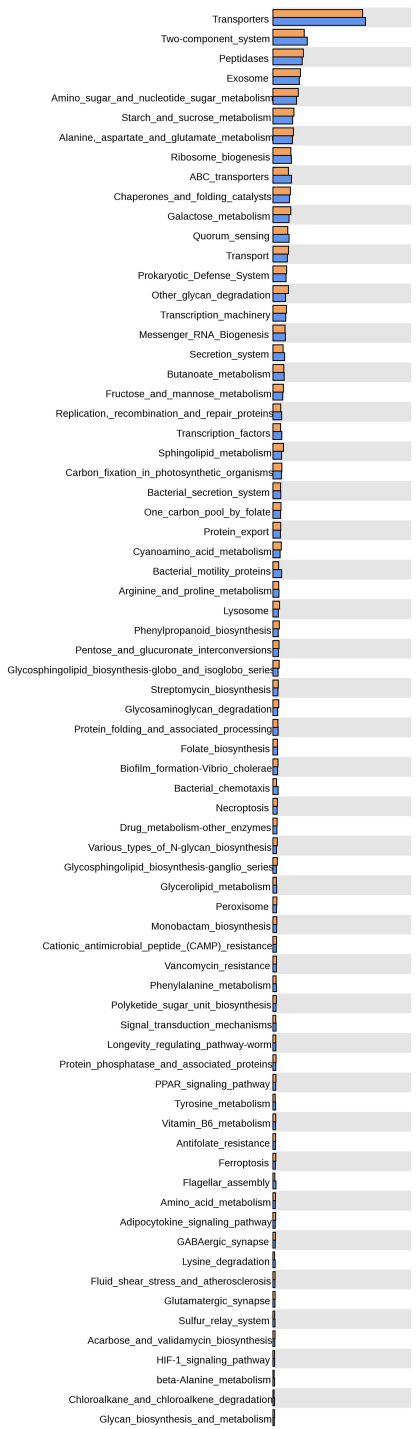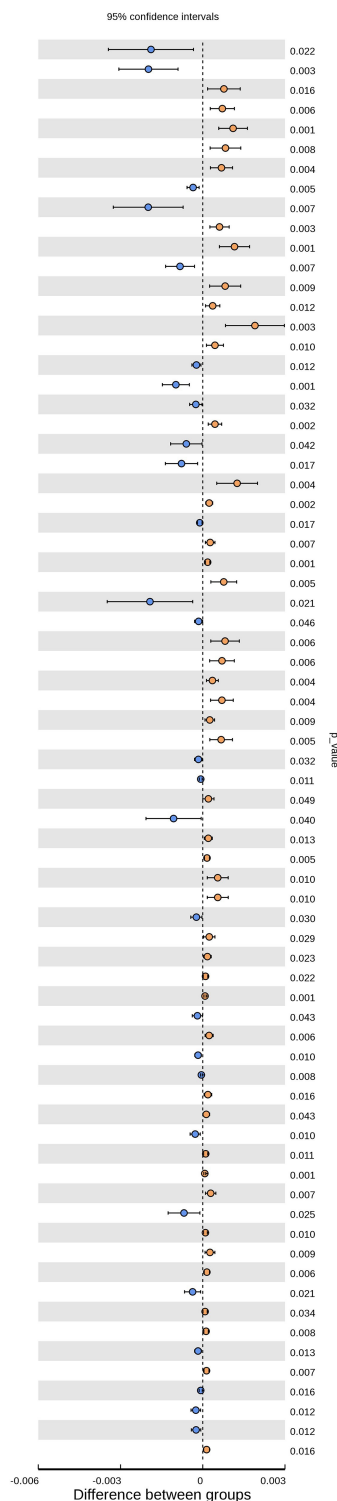

Means in groups

Difference between groups

P-value

Supplement: d0fo02871a1.pdf [file d0fo02871a1.pdf]
